# Supplementary material for: Negative imaginary parts of complex permeability and microwave absorption performance of core double-shelled FeCo/C/Fe2.5Cr0.5Se4 nanocomposites
Source: Royal Society of Chemistry journal article supplement (doi:10.1039/c6ra12772j), 2016-01-01
Supplement: c6ra12772j1.pdf [file c6ra12772j1.pdf]

Supporting information

**Negative imaginary parts of complex permeability and microwave  
absorption performance of core double-shelled FeCo/C/Fe<sub>2.5</sub>Cr<sub>0.5</sub>Se<sub>4</sub>  
nanocomposites**

D. Li,<sup>\*,a</sup> Y. Feng,<sup>a</sup> D. S. Pan,<sup>a</sup> L.W. Jiang,<sup>a</sup> Z.M. Dai,<sup>a</sup> S. J. Li,<sup>a</sup> Y. Wang,<sup>b</sup> J. He,<sup>\*,b</sup> W. Liu,<sup>a</sup> Z.D. Zhang<sup>a</sup>

<sup>a</sup>Shenyang National Laboratory for Materials Science, Institute of Metal Research, Chinese Academy of Sciences,

72 Wenhua Road, Shenyang, 110016, PR China

<sup>b</sup>Central Iron and Steel Research Institute, Division of Functional Materials, Beijing 100081, People's Republic of

China.

Corresponding authors:

\*Electronic email: [dali@imr.ac.cn](mailto:dali@imr.ac.cn), [hejun@cisri.com.cn](mailto:hejun@cisri.com.cn).

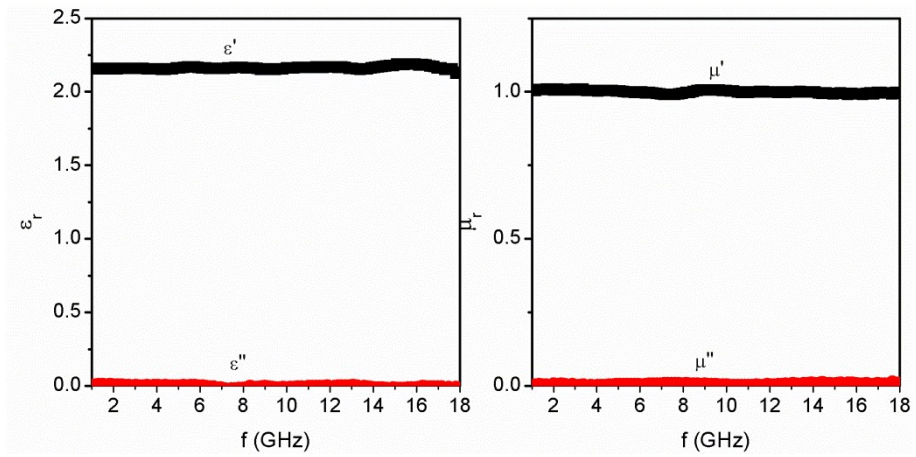

Fig. S1. Frequency dependence of  $\epsilon_r$  and  $\mu_r$  of the paraffin matrix.

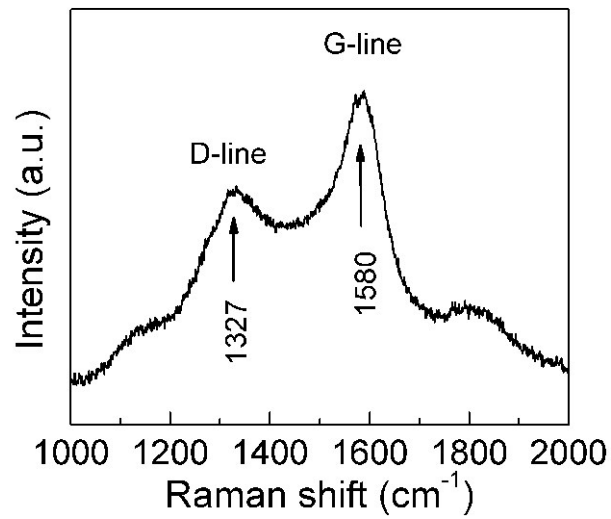

Fig. S2. Raman spectrum of carbon shell in the FeCo/C nanocapsules recorded at room temperature.

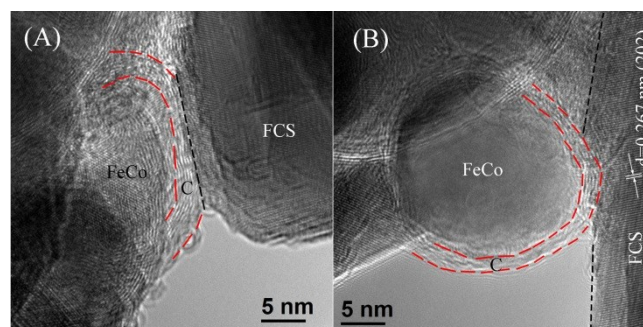

Fig. S3. High-resolution TEM images of the  $(x=0.1)\text{FeCo/C/Fe}_{2.5}\text{Cr}_{0.5}\text{Se}_4$  (FCS) nanocomposite.

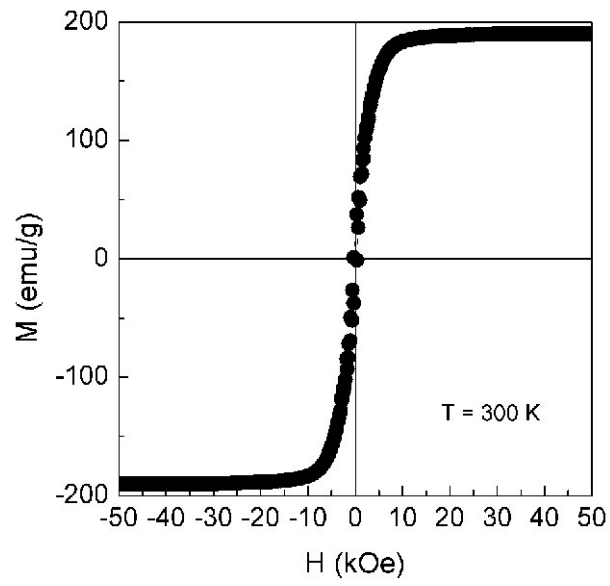

Fig. S4. Magnetic hysteresis loops of the FeCo/C nanocapsules measured at 300 K.

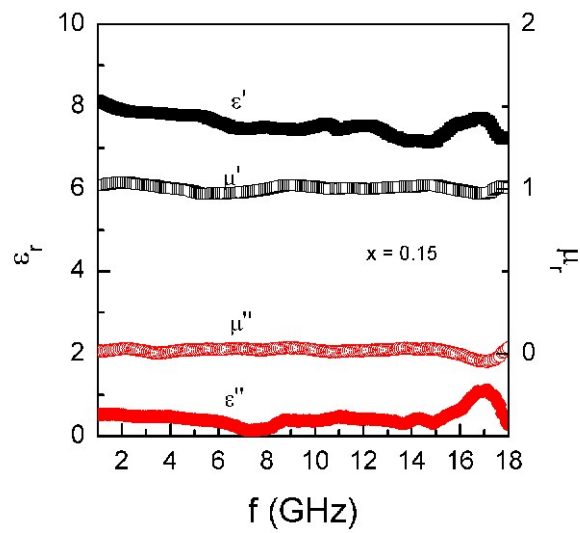

Fig. S5 Frequency dependence of the  $\epsilon_r$  and the  $\mu_r$  of the (x)FeCo/C/FCS-paraffin composite with  $x=0.15$ .

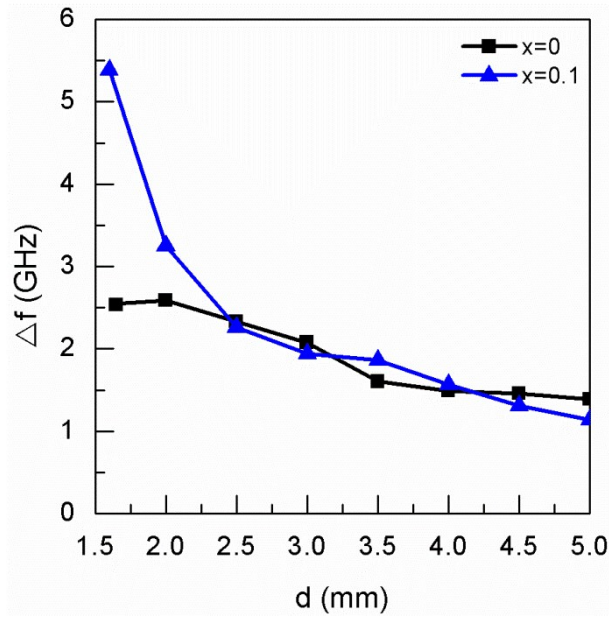

Fig. S6 Thickness dependence of the bandwidths ( $\Delta f$ ) of the (x)FeCo/C/FCS-paraffin composite with  $x=0$  and  $0.1$ .

The absorption bandwidth ( $\Delta f$ ) is the frequency range with  $RL \leq -10$  dB.

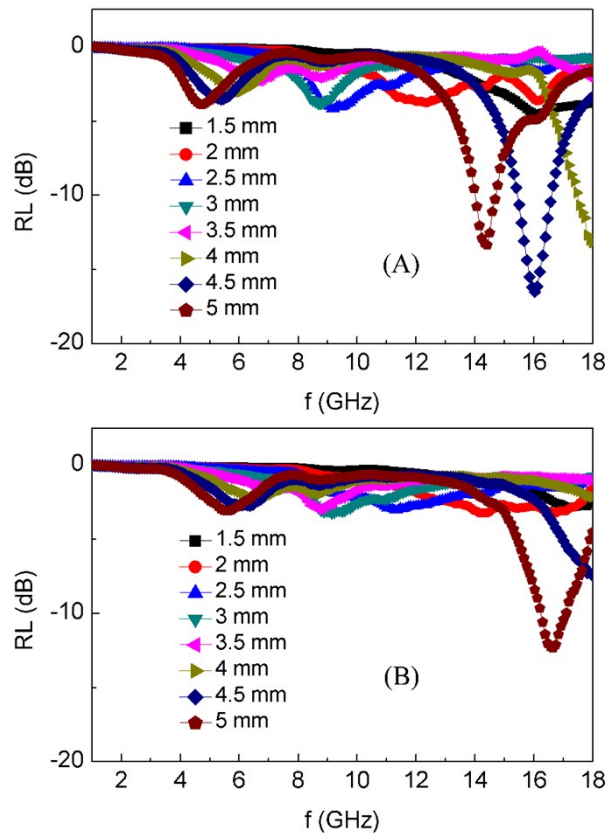

Fig. S7. Frequency dependences of RL of the (x)FeCo/C/FCS-paraffin composites with (A)  $x=0.05$  and (B)  $x=0.15$  at different absorbent layer thickness.

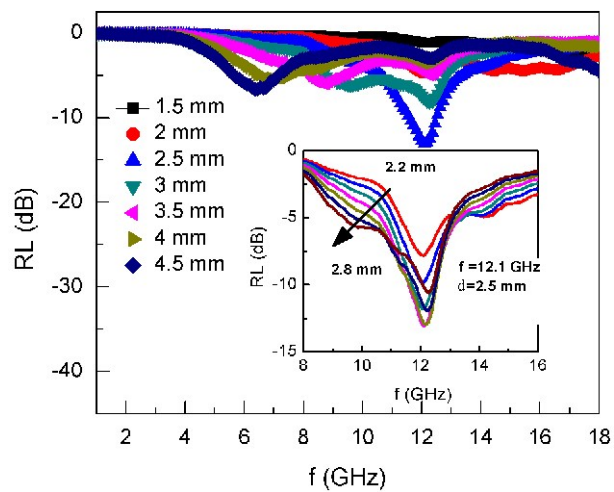

Fig. S8. Frequency dependence of RLs of the  $(x=0.2)\text{FeCo/C/FCS-paraffin}$  composite. The inset shows the RL- $f$  spectra at different absorber layer thickness.
